# Supplementary material
Source: PubMed Central journal article supplement (PMC5053099)
Supplement: NIHMS813992-supplement.pdf [file NIHMS813992-supplement.pdf]

## APPENDIX A. Initial clinical pharmacist call guide

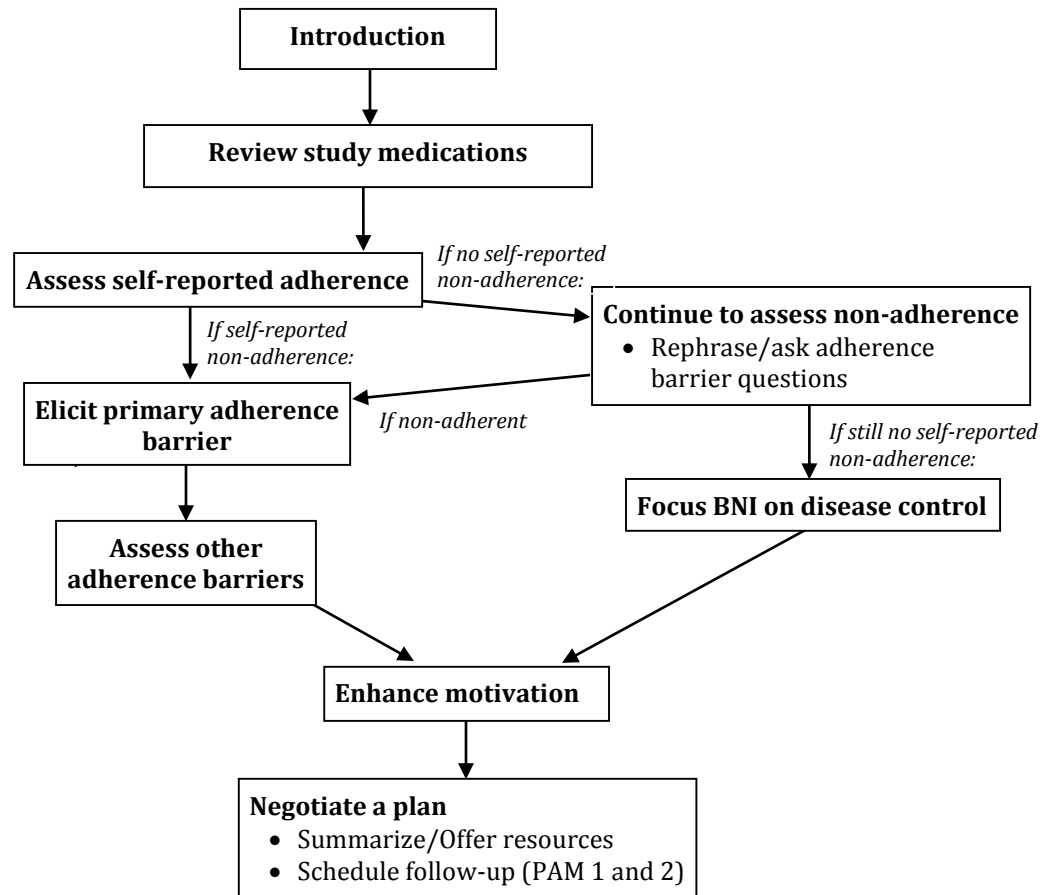

**APPENDIX B.** Follow-up clinical pharmacist call guide

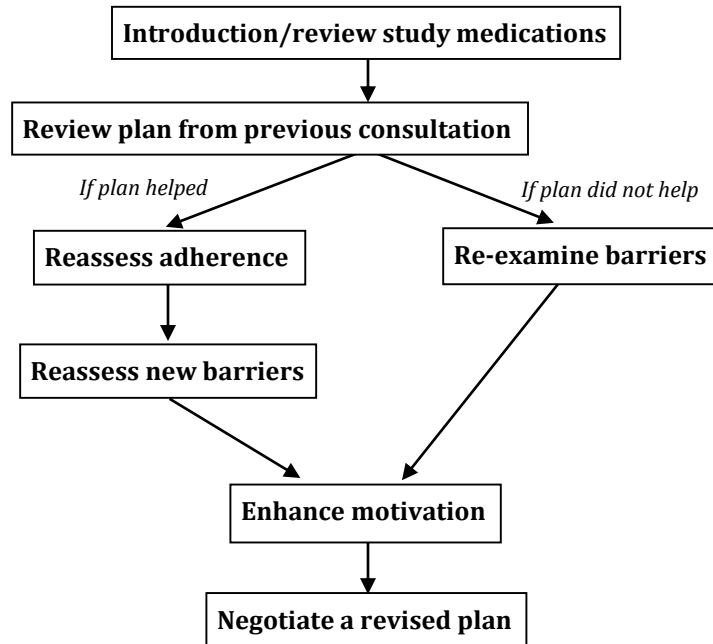

APPENDIX C. Text messaging flowchart and sample texts

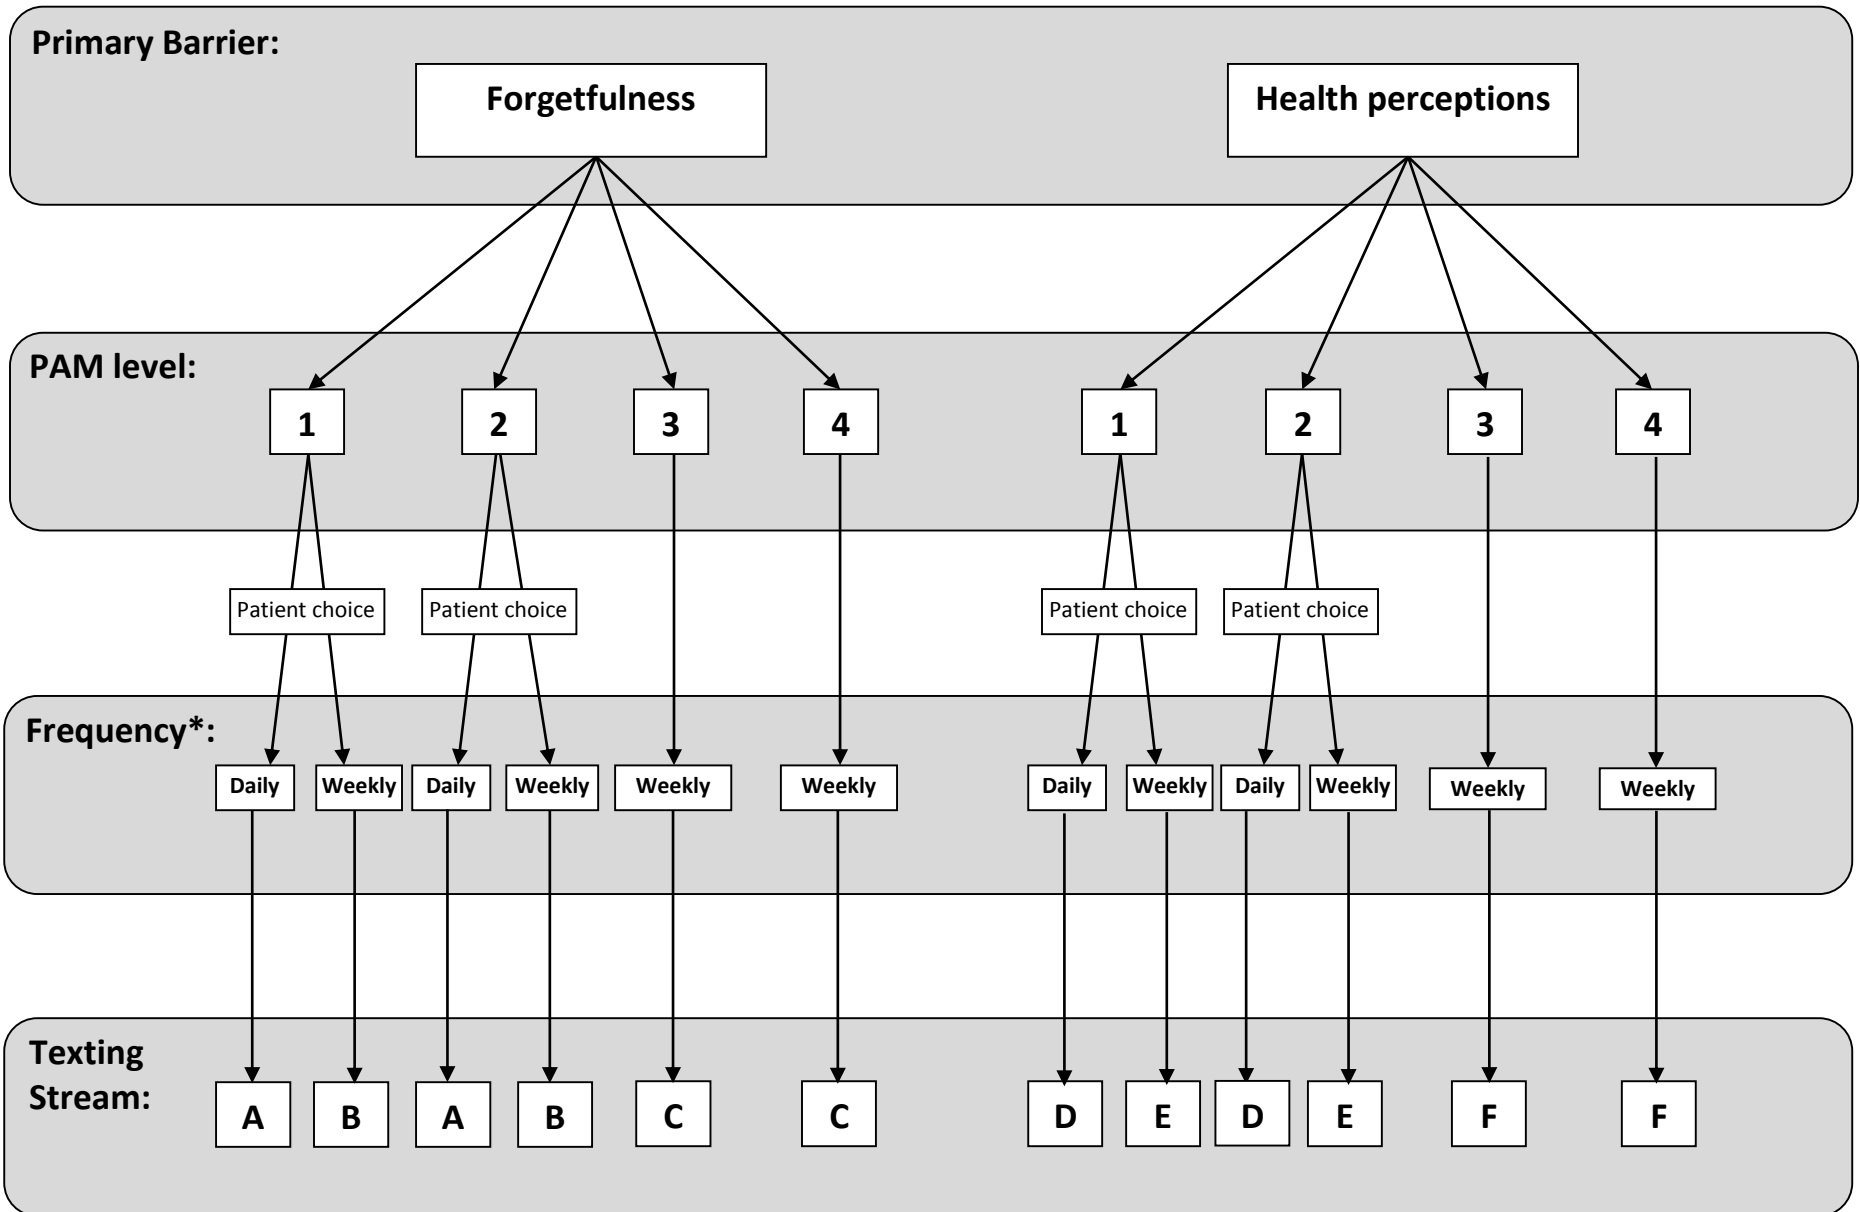

Examples of trial text messages for patients' primary barriers and PAM levels

| <b>Primary barrier</b> | <b>PAM levels</b> | <b>Text</b>                                                                                                                                              |
|------------------------|-------------------|----------------------------------------------------------------------------------------------------------------------------------------------------------|
| Forgetfulness          | 1, 2              | Hello from your Harvard Vanguard team! Here's your daily reminder to take your medication.                                                               |
| Forgetfulness          | 1, 2              | Think about the last time you didn't take your medication. What can you do to keep it from happening again?                                              |
| Forgetfulness          | 1, 2              | Do you drink coffee in the morning? Try to put your medication by your coffee pot to help you remember to take your medication.                          |
| Health perceptions     | 1, 2              | When you are feeling well, do you sometimes stop taking your medications? Skipping medications may affect your long-term health.                         |
| Health perceptions     | 1, 2              | Managing your health can be difficult. But taking your medications regularly can help prevent complications down the road. Stick to it!                  |
| Health perceptions     | 1, 2              | Set short term goals. Try to take your medications every day for the next 7 days. Remember, missing doses is missing out on better health.               |
| Forgetfulness          | 3, 4              | When you fill each prescription, check the bottle for the number of refills. Call your doctor for a new prescription when you have only one refill left. |
| Forgetfulness          | 3, 4              | Some people find using automated reminder, such as their phone's alarm or a medication tracker app on a smart phone to be useful.                        |
| Forgetfulness          | 3, 4              | Try to make your medication schedule a part of your daily routine. This will help you remember to take your medication on time.                          |
| Health perceptions     | 3, 4              | You can't always feel your medications working. It's important to take them for long-term benefit.                                                       |
| Health perceptions     | 3, 4              | As a former US Surgeon General has said: "Drugs don't work in patients who don't take them". Keep it up!                                                 |
| Health perceptions     | 3, 4              | If you skip doses of your scheduled medications, it can be hard for your Harvard Vanguard team to safely adjust your medicine doses at your next visit.  |
